# Supplementary material for: The Learning Loss Effect in Genetics: What Ideas Do Students Retain or Lose after Instruction?
Source: Atypon-hosted journal article supplement (doi:10.1187/cbe.16-10-0310), 2018-10-18
Supplement: combinedsupmats.pdf [file combinedsupmats.pdf]

**Table S1: Outline of Progression and Condensed Description of Levels**

*Progression Level*

| 1                                                                 | 2                                                     | 3                                 | 4                                                           | 5                                                                    | 6                                                          |
|-------------------------------------------------------------------|-------------------------------------------------------|-----------------------------------|-------------------------------------------------------------|----------------------------------------------------------------------|------------------------------------------------------------|
| <b>Construct A: Genetic organization</b>                          |                                                       |                                   |                                                             |                                                                      |                                                            |
| Recognize that correlation exists, but all incorrect              | 2 correct                                             | 3 correct                         | 4 correct                                                   | 5 correct                                                            | All 6 correct                                              |
| <b>Construct B: Genes code for proteins</b>                       |                                                       |                                   |                                                             |                                                                      |                                                            |
| Genes non-informational                                           | Genes informational                                   | Genes instruct the body at levels | Genes code for cell entities                                | Genes code for proteins                                              | Genes translated into protein                              |
| <b>Construct C1: Proteins do the work of the cell</b>             |                                                       |                                   |                                                             |                                                                      |                                                            |
| Cells perform functions                                           | Proteins good for your body                           | Proteins do cell's work           | Protein function depends on structure                       | Protein structure and function depends on amino acids in the protein | NA                                                         |
| <b>Construct C2: Proteins connect genes and traits</b>            |                                                       |                                   |                                                             |                                                                      |                                                            |
| Changes to genes change traits                                    | Changes to genes change cells                         | Changes to genes change proteins  | Changes to genes change proteins to change traits           | Changes to genes change amino acids in proteins                      | Changes to genes change protein functions to change traits |
| <b>Construct D: Cells express different genes</b>                 |                                                       |                                   |                                                             |                                                                      |                                                            |
| Cells different because they are in different places in the body  | Cells different because they have different functions | DNA tells cells to be different   | Different cells have different proteins for their functions | Somatic cells have same DNA but different proteins                   | Somatic cells have same DNA to express different proteins  |
| <b>Construct E: Genetic information is passed on to offspring</b> |                                                       |                                   |                                                             |                                                                      |                                                            |

**Table S1: Outline of Progression and Condensed Description of Levels**

*Progression Level*

| 1 | 2 | 3 | 4 | 5 | 6 |
|---|---|---|---|---|---|
|---|---|---|---|---|---|

|                                                |                                            |                               |                                   |                                                            |    |
|------------------------------------------------|--------------------------------------------|-------------------------------|-----------------------------------|------------------------------------------------------------|----|
| Organisms can only get traits of their parents | Offspring get half of DNA from each parent | Alleles are randomly assorted | Chromosomes are randomly assorted | Chromosomes can swap sections increasing genetic variation | NA |
|------------------------------------------------|--------------------------------------------|-------------------------------|-----------------------------------|------------------------------------------------------------|----|

*Construct F: There are patterns of correlations between genes and traits*

|                                             |                                                                 |                                                                  |                                                                            |                                                                                         |    |
|---------------------------------------------|-----------------------------------------------------------------|------------------------------------------------------------------|----------------------------------------------------------------------------|-----------------------------------------------------------------------------------------|----|
| Organisms have different versions of traits | Traits from parents can mix or compete to give offspring traits | Organisms get one allele per parent, and traits can be predicted | Alleles differ in sequence which affects proteins to give trait variations | Level 4 + Dominant and recessive relationships can be explained by protein interactions | NA |
|---------------------------------------------|-----------------------------------------------------------------|------------------------------------------------------------------|----------------------------------------------------------------------------|-----------------------------------------------------------------------------------------|----|

*Construct G1: DNA varies between and within species*

|                                              |                              |                                                    |                                                              |                                                                         |                                                                                |
|----------------------------------------------|------------------------------|----------------------------------------------------|--------------------------------------------------------------|-------------------------------------------------------------------------|--------------------------------------------------------------------------------|
| Organisms have different traits or functions | Organisms have different DNA | Organisms have different DNA even within a species | Organisms within species have both similar and different DNA | Organisms of different species have some similar and some different DNA | The more conserved DNA is between species, the more important the gene product |
|----------------------------------------------|------------------------------|----------------------------------------------------|--------------------------------------------------------------|-------------------------------------------------------------------------|--------------------------------------------------------------------------------|

*Construct G2: Changes to genetic information result in increased variation and can drive evolution*

|                                       |                                                          |                                                     |                                                                                               |                                                               |    |
|---------------------------------------|----------------------------------------------------------|-----------------------------------------------------|-----------------------------------------------------------------------------------------------|---------------------------------------------------------------|----|
| Species look and function differently | Organisms within a species look and function differently | Changes to an organism can be beneficial or harmful | DNA changes can be beneficial, neutral, or harmful, and can change protein structure/function | DNA changes lead to increased genetic variation and evolution | NA |
|---------------------------------------|----------------------------------------------------------|-----------------------------------------------------|-----------------------------------------------------------------------------------------------|---------------------------------------------------------------|----|

*Construct H: The environment interacts with genetic information*

|  |  |  |  |  |  |
|--|--|--|--|--|--|
|  |  |  |  |  |  |
|--|--|--|--|--|--|

**Table S1: Outline of Progression and Condensed Description of Levels**

*Progression Level*

| 1                                | 2                                          | 3                                                    | 4                                                        | 5                                                                               | 6                                                                                         |
|----------------------------------|--------------------------------------------|------------------------------------------------------|----------------------------------------------------------|---------------------------------------------------------------------------------|-------------------------------------------------------------------------------------------|
| Environment can affect organisms | Environment can affect traits or functions | Environment can affect our cells, organs, or tissues | Environment can change or mutate things inside of a cell | Environment can change type and amount of proteins that influence cell function | Environment can change genes which change proteins, or change gene expression of proteins |

*Construct I: Only mutations in gametes can be passed on to offspring*

|                                                    |                                               |                                                           |                                                                        |    |    |
|----------------------------------------------------|-----------------------------------------------|-----------------------------------------------------------|------------------------------------------------------------------------|----|----|
| A change of traits can be passed down to offspring | DNA mutations can be passed down to offspring | Only mutations in gametes can be passed down to offspring | Level 3 + mutations to somatic cells are passed on to descendent cells | NA | NA |
|----------------------------------------------------|-----------------------------------------------|-----------------------------------------------------------|------------------------------------------------------------------------|----|----|

*Construct J: Gene expression can change at any point during an organism's lifespan*

|                                                                    |                                           |                                                               |                                                           |    |    |
|--------------------------------------------------------------------|-------------------------------------------|---------------------------------------------------------------|-----------------------------------------------------------|----|----|
| Gene expression is not regulated or controlled, or does not change | Genes can be turned on during development | Genes can be turned on and/or off only during key life stages | Gene expression can change at any point during one's life | NA | NA |
|--------------------------------------------------------------------|-------------------------------------------|---------------------------------------------------------------|-----------------------------------------------------------|----|----|

**Table S2: Instructional Design and Activities Related to Constructs**

| <b>Unit Driving Question</b>                                             | <b>Instructional Time</b> | <b>Purpose</b>                                                                                                                              | <b>Description of Activities/Investigations</b>                                                                                                                                                                                                                                                                                                                           | <b>Constructs Addressed</b> |
|--------------------------------------------------------------------------|---------------------------|---------------------------------------------------------------------------------------------------------------------------------------------|---------------------------------------------------------------------------------------------------------------------------------------------------------------------------------------------------------------------------------------------------------------------------------------------------------------------------------------------------------------------------|-----------------------------|
| <i>Pre-Assessment (early October)</i>                                    |                           |                                                                                                                                             |                                                                                                                                                                                                                                                                                                                                                                           |                             |
| How do cells become cancerous?<br>[Intervention Unit]                    | 2.5 weeks                 | Students explore how cells become differentiated by expressing certain proteins and how abnormal protein expression can lead to cancer.     | Students examine different types of cells, describe how the structure of cells relates to function, and relate expressed proteins to different cell types. Students discover how stem cells differentiate by expressing different proteins and compare stem cells to cancer cells.                                                                                        | B*, C1*, C2*, D*, H*        |
| Why are Siamese cats colored the way they are?<br>[Intervention Unit]    | 2.5 weeks                 | Students explore protein structure and function to learn how proteins lead to observable traits.                                            | Students examine paper and computer models of enzymes and other proteins, including molecular motors, to determine the relationship between structure and function. Students discover that under certain conditions, enzymes can denature and fail to perform their function. Students develop an explanation for how proteins in Siamese cats lead to observable traits. | C1*, C2*, H*                |
| How can <i>Hyla chrysoscelis</i> , a native frog, tolerate being frozen? | 1.5 weeks                 | Students examine protein expression and function in a frog species. Students relate protein function to observable and advantageous traits. | Students consider how proteins may facilitate water and nutrient transport and how transport may help protect a living organism during a freeze cycle. Students develop an explanation for how proteins in frogs lead to observable, advantageous traits.                                                                                                                 | C1*, C2, G1, G2*, H*        |
| <i>Midpoint-Assessment (mid November)</i>                                |                           |                                                                                                                                             |                                                                                                                                                                                                                                                                                                                                                                           |                             |
| How can we reduce the risk of obesity in our community?                  | 2.5 weeks                 | Students investigate the structure and function of key macromolecules (protein, carbohydrates, lipids, and nucleic acids).                  | Students explore the structure and function of proteins, carbohydrates, lipids, and nucleic acids in food and in the human body. Students develop an explanation for how nutrients from food are used in by the human body.                                                                                                                                               | A, B*, C1,                  |

|                                                                                                  |           |                                                                                                                                                                                             |                                                                                                                                                                                                                                                                                                                                  |                              |
|--------------------------------------------------------------------------------------------------|-----------|---------------------------------------------------------------------------------------------------------------------------------------------------------------------------------------------|----------------------------------------------------------------------------------------------------------------------------------------------------------------------------------------------------------------------------------------------------------------------------------------------------------------------------------|------------------------------|
| How can there be a case of disputed maternity?<br>[Intervention Unit]                            | 2.5 weeks | Students explore genetic inheritance and realize that connections exist between meiosis and patterns of inheritance.                                                                        | Students examine DNA structure, chromosome structure, and karyotypes to determine differences and similarities between parents and offspring. Students investigate meiosis and fertilization to determine patterns of inheritance.                                                                                               | A, B, C1, C2, E*, F*, I      |
| Can we genetically engineer a superhuman?<br>[Intervention Unit]                                 | 2.5 weeks | Students examine how DNA mutations can alter protein structures and functions in both bad (genetic diseases) and good (superhuman) ways.                                                    | Students explore genetic diseases and their causes at the gene, protein, cell and trait levels. Students examine the sources and types of mutations, and how mutations to DNA can change protein structures and functions. Students also explore how observable traits can be explained by Mendelian and non-Mendelian genetics. | A, B*, C1, C2, D*, E*, F*, I |
| How can we diagnose and develop a treatment plan for a simulated patient with a genetic disease? | 2 weeks   | Students use their understanding of molecular genetics developed throughout the learning sequence to diagnose and develop a novel treatment for a simulated patient with a genetic disease. | Students receive a history and physical for a simulated patient with a genetic disease. Students investigate the symptoms, relate symptoms to specific proteins, and determine protein mutations causing the symptoms. Students propose novel treatments to reverse the effects of the protein mutation.                         | A, B, C1, C2, D, E, F, I     |

---

*Post-Assessment (mid March)*

---

\* Indicates a key construct for the unit

Note: Instructional period spanned ~23 calendar weeks; targeted instruction to genetics constructs (after accounting for holidays, snow days, other instruction during this time) spanned ~16 weeks.

Used with permission from Todd, Romine, & Cook Whitt, 2017.
